# Supplementary material for: Precise adjustment of structural anisotropy and crystallinity on metal–Fe3O4 hybrid nanoparticles and its influence on magnetic and catalytic properties
Source: Royal Society of Chemistry journal article supplement (doi:10.1039/c4tc00416g), 2014-01-01
Supplement: c4tc00416g1.pdf [file c4tc00416g1.pdf]

## Electronic Supplementary Information

### Precise Adjustment of Structural Anisotropy and Crystallinity on Metal-Fe<sub>3</sub>O<sub>4</sub> Hybrid Nanoparticles and Its Influence on Magnetic and Catalytic Properties

5

Mijong Kim and Hyunjoon Song\*

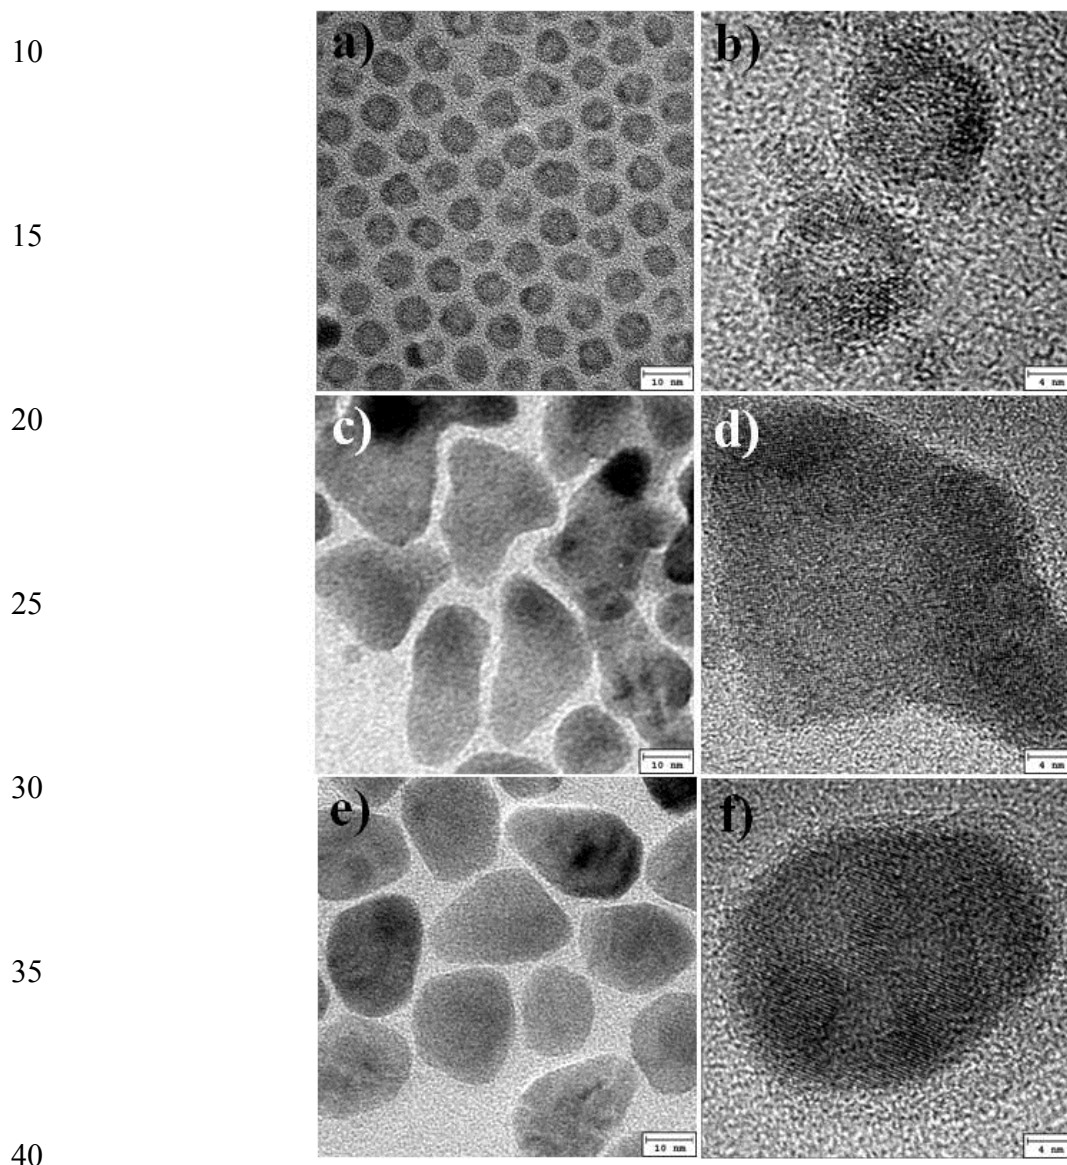

**Fig. S1** TEM images of Fe<sub>3</sub>O<sub>4</sub> NPs prepared under the reaction conditions identical to the synthetic process of **Pd-1**, **Pd-2** and **Pd-3** except for the injection of Pd seeds. a, b) **Pd-1**, c, d) **Pd-2** and e, f) **Pd-3** without Pd seed parts. The bars represent a,c,e) 10 nm and b,d,f) 4 nm, respectively.

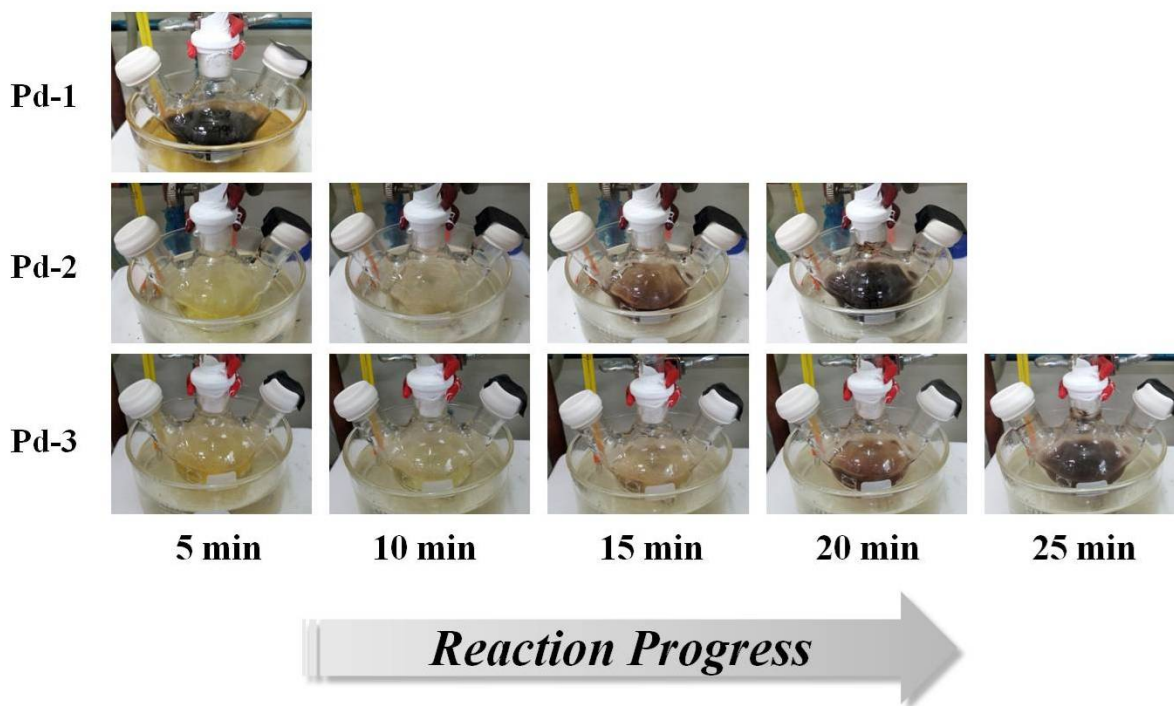

**Fig. S2** Color changes of the reaction mixtures of **Pd-1**, **Pd-2** and **Pd-3** in the absence of metal seeds during the synthetic process (**Pd-1**,  $\text{Fe}(\text{CO})_5$  : OAm : OA = 1 : 8 : 0, **Pd-2**, 1 : 6 : 2.1, **Pd-3**, 1 : 4 : 4.2).

5

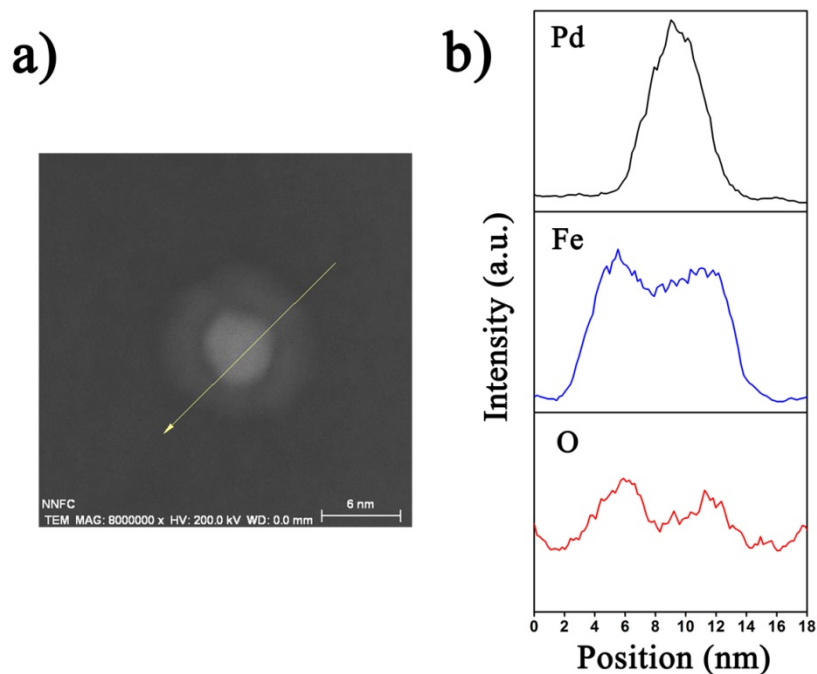

**10 Fig. S3** a) High-magnification HAADF-STEM image of a single **Pd-1** and b) spatial elemental distribution obtained from EDX line-scan measurement.

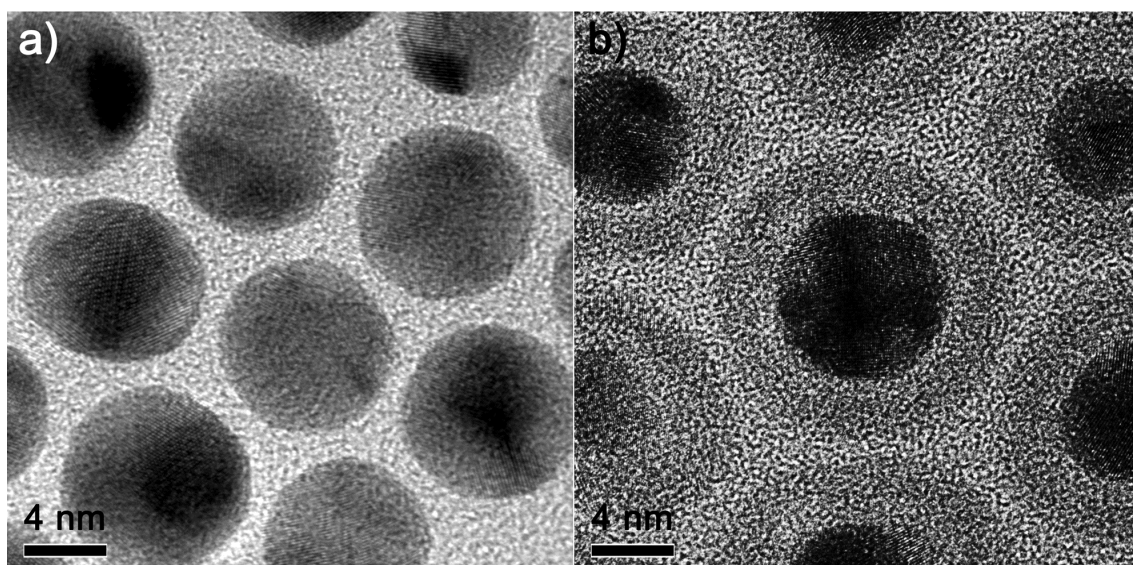

**Fig. S4** TEM images of a) Au NPs and b) **Au-1** (Au@Fe<sub>3</sub>O<sub>4</sub> yolk-shell NPs). The bright area between 5 Au core and Fe<sub>3</sub>O<sub>4</sub> shell is the void area caused by Kirkendall effect.

10

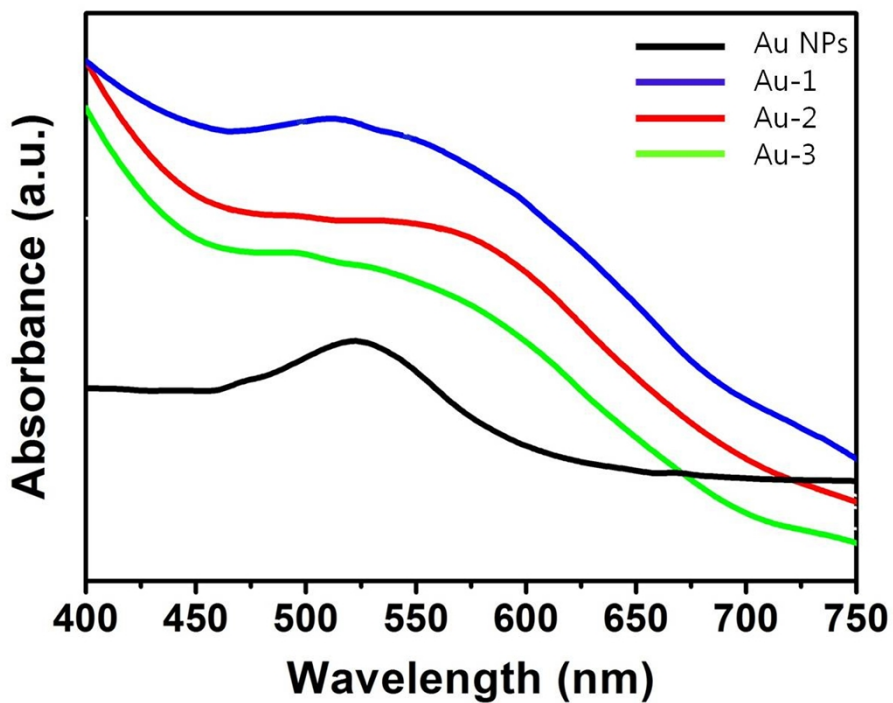

**Fig. S5** UV-Vis spectra of Au NPs, **Au-1**, **Au-2**, and **Au-3**.
